# Supplementary material for: Detection and variability analyses of CRISPR-like loci in the H. pylori genome
Source: PeerJ journal article supplement (doi:10.7717/peerj.6221), 2019-01-11

**Supplementary Figure S1. Analysis by cluster of the CRISPR-like loci inserted in the VlpC gene.** The alignments of the VlpC gene using J99 strain as reference genome (first line) allowed us to classify all strains in six clusters attending to different structures found in DRs and spacers of CRISPR-like loci (A to F). Color indicates the degree of variation in both the gene and its CRISPR-like loci. Dark (high values of pairwise % identity), light (low pairwise % identity). Solid line indicates the presence of gaps. Alignment was performed with Muscle software. In the figures, only the region of gene that includes the CRISPR-like locus is showed.

J99

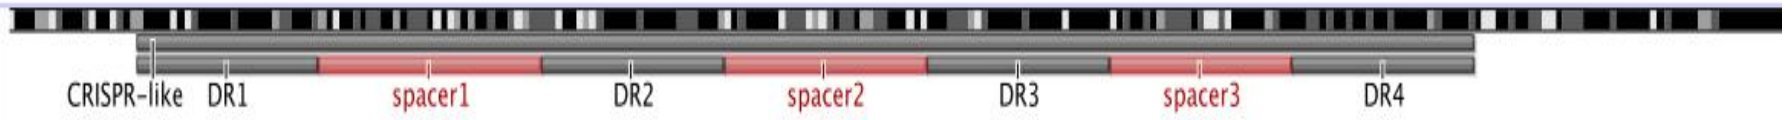

NC\_000915

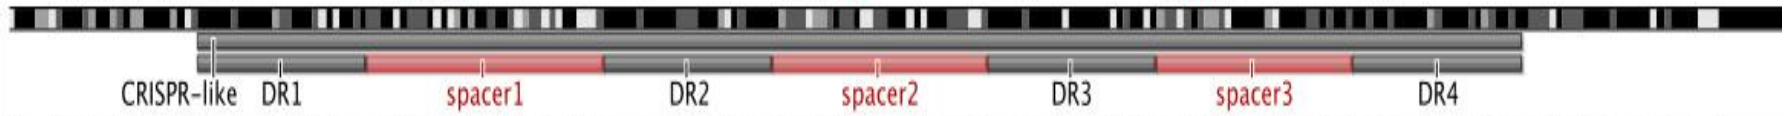

NC\_018939

2017  
2018  
908  
S.Africa7  
Rif1  
Rif2  
SJM180  
PeCan18  
B8  
B38  
ELS37  
Lithuania75  
India7  
SNT49  
51  
XZ274  
F32  
Cuz20  
Shi112  
Shi169  
Sat464  
Shi470

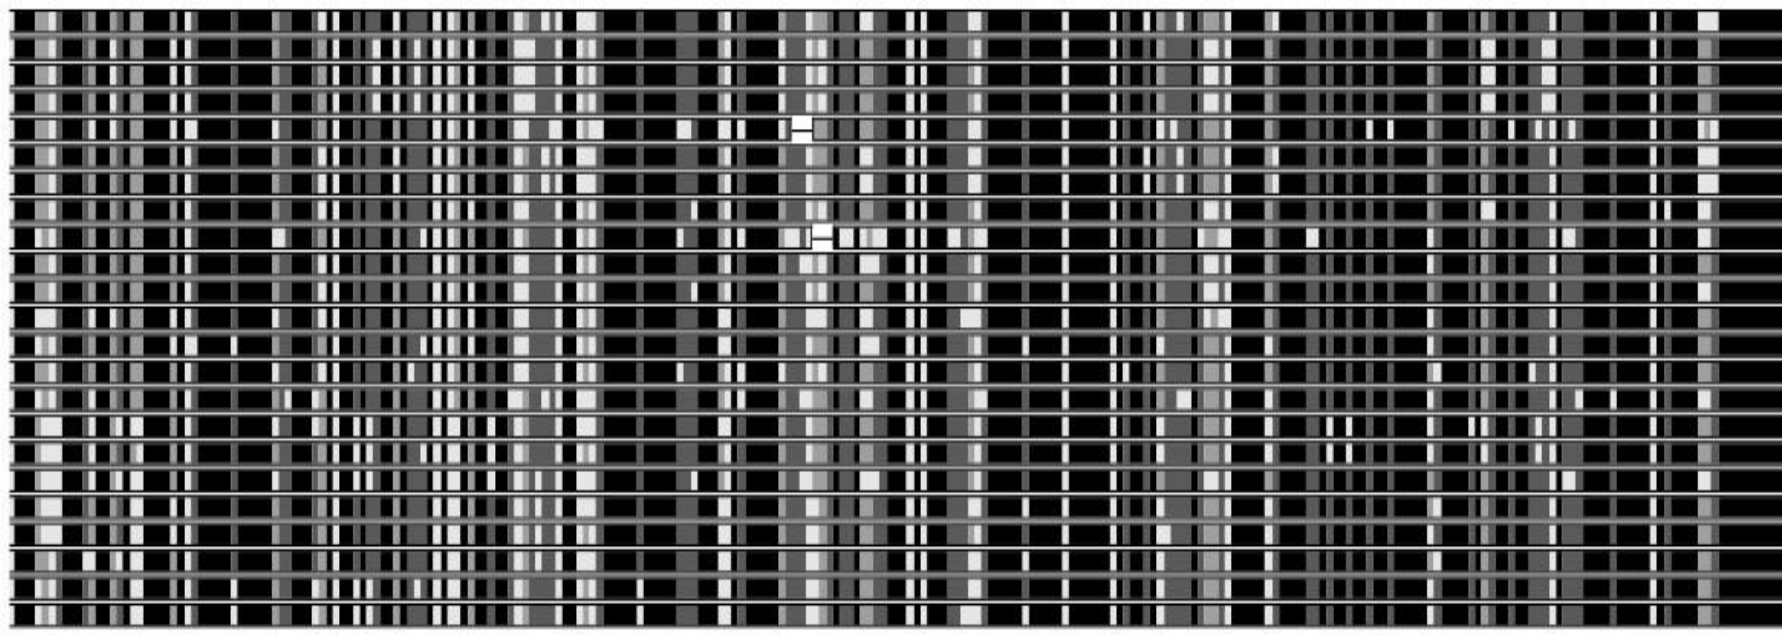

Supplement: Supplementary_Figure_S1_A.pdf [file Supplementary_Figure_S1_A.pdf]
